# Supplementary material
Source: MDPI journal article supplement (https://www.mdpi.com/2035-8377/13/4/53)
Supplement: s1 [file s1]

**Table S1. Posterior fossa tumor and central precocious puberty: reported cases in the literature**

| Reference                   | No. | Sex And Age | Brain Tumor Histology | Location     | Endocrinological Symptoms at Presentation                               | Hydrocephalus at Presentation | Endocrinological Therapy    | Tumor Treatment                     |
|-----------------------------|-----|-------------|-----------------------|--------------|-------------------------------------------------------------------------|-------------------------------|-----------------------------|-------------------------------------|
| <i>Our case</i>             | 1   | Male, 11    | Ganglioglioma         | Cerebellum   | pubarche, incremented testicular volume,height > 95°, advanced bone age | no                            | GnRH agonist (triptorelina) | Surgery                             |
| <i>Medina et al. [8]</i>    | 2   | Male, 7     | Medulloblastoma       | Cerebellum   | pubarche, incremented testicular volume, acne, height and weight >95°   | yes                           | none                        | Surgery, chemotherapy, radiotherapy |
| <i>Josan et al. [9]</i>     | 3   | Female, 2   | Pilocytic astrocytoma | Cerebellum   | vaginal bleeding                                                        | no                            | none                        | Surgery                             |
| <i>Gass et al. [10]</i>     | 4   | n.a.        | Glioma                | Tectal plate | n.a.                                                                    | yes                           | none                        | ETV                                 |
| <i>Rossfeld et al. [11]</i> | 5   | Male, 7     | Medulloblastoma       | Cerebellum   | pubarche, axillary hair, body odor                                      | n.a.                          | GnRH agonist (leuprolide)   | Surgery, chemotherapy               |
| <i>Wendt et al. [12]</i>    | 6   | Female, 7   | Pilocytic astrocytoma | Cerebellum   | menarche, advanced bone age                                             | n.a.                          | n.a.                        | Surgery                             |

CPP = central precocious puberty; n. a. = not available; ETV= endoscopic third ventriculostomy
